# Supplementary material
Source: Research Square preprint supplement (doi:10.21203/rs.3.rs-10187128/v1)
Supplement: Supplementary file 1 [file b509168d15b3da79270e87d0.docx]

**Supplementary Material**

**The Delphi tholos reconsidered: A geometrical-physical approach to the plausibility of ritual sonic use**

Fabrizio Barone1, * [0000-0002-8069-8490], Marco Casazza1 [0000-0002-7579-3231]

1University of Salerno, Department of Medicine, Surgery and Dentistry “Scuola Medica Salernitana”, Baronissi, Italy

**S1. Geometric reconstruction of the considered case studies**

The acoustic analysis was based on a set of reconstructed internal air volumes rather than on a single architectural reconstruction. This choice was necessary because neither the Delphic Tholos nor the Epidaurian Thymele survives as a complete enclosed cavity. The preserved remains constrain the planimetric dimensions more reliably than the elevation and roofing systems; therefore, the latter were treated as explicit reconstruction variables.

For the Delphic Tholos, the adopted scenarios were informed by recent architectural and structural studies on the roofing system of the Tholos of Athena Pronaia, which show that the original roof configuration remains uncertain and that different conical, frustoconical, and low-profile hypotheses are still admissible1. For the Epidaurian Thymele, the scenarios were based on the broad-cone family of reconstructions discussed in relation to the design and possible functions of the building2. In both cases, additional hemispherical configurations were retained only as geometric control scenarios. These controls were not intended as direct archaeological reconstructions of Delphi or Epidauros, but as idealized tholos-type cavities reflecting near-unit height-to-diameter proportions discussed in the structural literature on Mycenaean tholoi3.

Plan area and volume were computed as:

|  | (S1) |
| --- | --- |
|  | (S2) |

where is the internal radius of the cavity at height . For conical and broad-conical roofs:

|  | (S3) |
| --- | --- |

For frustoconical roofs:

|  | (S4) |
| --- | --- |

For hemispherical roofs:

|  | (S5) |
| --- | --- |

In all cases, the cylindrical portion was defined as:

|  | (S6) |
| --- | --- |

These reconstructed internal volumes were then used as the acoustic domains for the modal analysis.

**S2. Mathematical formulation of the method**

**2.1 Geometric representation of the internal cavity**

Each architectural scenario is represented as an axisymmetric cavity obtained by revolving a meridional profile around the vertical axis. Let be the vertical coordinate, with . Let be the internal radius of the cavity at height . Therefore, the acoustic domain, , is:

|  | (S7) |
| --- | --- |

In all cases, the lower part of the cavity is cylindrical, so that

|  | (S8) |
| --- | --- |

where is the internal cella radius.

Above the cylindrical drum, different roof hypotheses are introduced through different functional forms of . For a conical or broad-conical roof:

|  | (S9) |
| --- | --- |

For a frustoconical roof with upper radius :

|  | (S10) |
| --- | --- |

For the hemispherical hypothesis, the upper closure is described as a hemisphere of radius , tangent to the cylindrical drum at , so that:

|  | (S11) |
| --- | --- |

Then, the enclosed volume is:

|  | (S12) |
| --- | --- |

and the plan area is:

|  | (S13) |
| --- | --- |

This representation allows all reconstructions to be treated in a unified analytical framework while preserving their geometric differences.

**S2.2 Acoustic eigenvalue problem in an axisymmetric cavity**

The air inside the cavity is treated as a homogeneous, isotropic acoustic medium with sound speed . The rigid boundaries imply Neumann conditions for the acoustic pressure field . The modal problem is therefore written as:

|  | (S14) |
| --- | --- |

with

|  | (S15) |
| --- | --- |

where is the acoustic wavenumber. The corresponding natural frequencies are:

|  | (S16) |
| --- | --- |

Because the domain is axisymmetric, the pressure field is expanded in cylindrical coordinates in azimuthal families indexed by the integer . For each azimuthal order , the trial functions are written as:

|  | (S17) |
| --- | --- |

where is the Bessel function of the first kind of order , is the -th zero of , is the axial index. The use of zeros of is consistent with rigid radial behaviour in a cylindrical reference domain.

The modal solution is obtained in weak form. For a basis , the generalized eigenvalue problem is:

|  | (S18) |
| --- | --- |

where , and the mass and stiffness matrices are:

|  | (S19) |
| --- | --- |
|  | (S20) |

After separation of the azimuthal factor and reduction to the meridional section, the integrals become:

|  | (S21) |
| --- | --- |
|  | (S22) |

The matrices are evaluated numerically by quadrature over and over the local radius . Solving the eigenproblem yields a discrete set of eigenvalues , from which the modal frequencies are obtained as:

|  | (S23) |
| --- | --- |

Only frequencies in the audible interval selected for the study,were retained in the subsequent matching analysis.

**S2.3 Musical intervallic templates and instrumental scenarios**

The comparison with musical structures was performed using transposable intervallic templates, rather than fixed absolute scales. Each template was defined by a set of octave-bounded frequency ratios , with and . For each template, the absolute grid was generated by multiplying the ratios by a reference frequency and by octave transpositions. The reference frequency was not interpreted as a historically fixed pitch, but as a free transposition parameter searched over the interval used in the MATLAB pipeline.

Five intervallic templates were used: three diatonic heptatonic templates and two chromatic comparative templates. The diatonic branch was used as the primary comparative set for both Delphi and Epidauros. The chromatic branch was retained as a separate sensitivity branch, mainly because of the Epidaurian musical dossier and its discussion in relation to chromatic Hyperionian material. The two branches were ranked separately throughout the analysis.

**Table S2.** Intervallic templates used in the musical matching procedure

| **Template name in MATLAB** | **Family** | **Ratios within one octave** | **Status in analysis** | **Interpretation** |
| --- | --- | --- | --- | --- |
| DorianLike_Heptatonic_Diatonic | Diatonic | (1, 9/8,81/64,4/3,3/2, 27/16,243/128,2) | Primary | Conservative heptatonic diatonic framework |
| PhrygianLike_Heptatonic_Diatonic | Diatonic | (1,256/243,9/8,32/27, 4/3,3/2, 128/81,2) | Primary | Phrygian-family diatonic comparator |
| HyperphrygianLike_Heptatonic_Diatonic | Diatonic | (1,16/15, 6/5,4/3,3/2, 8/5,9/5,2) | Secondary | Additional diatonic sensitivity comparator |
| Chromatic_Hyperionian_Sensitivity | Chromatic | (1,16/15,6/5, 4/3,3/2, 8/5,16/9,2) | Primary comparative | Chromatic sensitivity template motivated by the Epidaurian dossier |
| Chromatic_Lydian_Sensitivity | Chromatic | (1,16/15,5/4,4/3,3/2,8/5, 15/8,2) | Primary comparative | Chromatic sensitivity template used to test possible Lydian-related alternatives |

The instrumental classes were restricted to members of the lyre/kithara and aulos families, because these are among the best-attested sound-producing systems in ancient Greek musical culture and are central to the relationship between harmonic theory, notation, and instrumental practice [S3–S5]. The frequency bands were used only as operational filters for the modal sets, not as exact reconstructions of individual historical instruments.

**Table S3.** Instrumental source classes and admissible template families

| **Source class in MATLAB** | **Frequency band [Hz]** | **Admissible templates** |
| --- | --- | --- |
| ChelysLyre | 160–900 | Dorian-like diatonic; Hyperionian chromatic; Lydian chromatic |
| KitharaFamily | 180–1000 | Dorian-like diatonic; Phrygian-like diatonic; Hyperionian chromatic; Lydian chromatic |
| AulosHigh | 356–1200 | Dorian-like diatonic; Phrygian-like diatonic; Hyperphrygian-like diatonic; Hyperionian chromatic; Lydian chromatic |
| AulosKitharisterios | 244–1000 | Dorian-like diatonic; Phrygian-like diatonic; Hyperionian chromatic; Lydian chromatic |
| AulosTeleios | 150–900 | Dorian-like diatonic; Phrygian-like diatonic; Hyperphrygian-like diatonic; Hyperionian chromatic; Lydian chromatic |

**S2.4 Instrumental frequency grids**

The comparison with musically plausible source structures is not performed against fixed absolute notes, but against transposable frequency grids derived from intervallic templates. For each template, let be the set of frequency ratios within one octave, with and . Given a reference frequency , the absolute grid is defined as:

|  | (S24) |
| --- | --- |

restricted to the analysed range

The reference frequency is not interpreted as a historically fixed pitch. It is treated as a transposition parameter and searched within a plausible interval,

Separate families of templates are considered for the diatonic and chromatic branches. Their rankings are kept separate throughout the analysis.

**S2.5 Source-band filtering and modal weights**

For each instrumental source class, only those cavity modes falling in the corresponding source band are retained. If the modal set for a given scenario is and the instrumental band is , then the filtered set is:

|  | (S25) |
| --- | --- |

Each mode is assigned a weight combining two factors. First, a local density penalty is introduced to reduce the dominance of very crowded modal regions. Let be the modal frequency in cents. The local density around is:

|  | (S26) |
| --- | --- |

with cents.

Second, a low-frequency emphasis is introduced through:

|  | (S27) |
| --- | --- |

where is the minimum frequency in the band and .

The final weight is:

|  | (S28) |
| --- | --- |

followed by normalization to unit mean.

**S2.6 Method 1: absolute-frequency distribution matching**

The first matching procedure compares the weighted distribution of cavity modes with the distribution of a transposed instrumental grid in log-frequency space. Let be the logarithmic frequency coordinate. This transformation expresses frequency distances in octave units, so that equal musical intervals correspond to equal distances along the -axis. The use of does not imply octave folding or pitch-class reduction: the comparison remains in the absolute-frequency domain, but frequency distances are measured on a logarithmic scale.

For a given set of band-limited modal frequencies , with associated modal weights , and for a transposed instrumental grid , two kernel-density distributions are constructed over a fixed logarithmic grid . Gaussian kernels with bandwidth are used:

|  | (S29) |
| --- | --- |
|  | (S30) |

Here, is the weighted modal-frequency density of the reconstructed cavity, while is the density associated with the transposed instrumental template. The constants, and , normalize the two distributions over the fixed logarithmic grid.

Three similarity terms are then computed. First, the Pearson correlation between the two density vectors is calculated as:

|  | (S31) |
| --- | --- |

Second, the Bhattacharyya coefficient is computed as:

|  | (S32) |
| --- | --- |

The Bhattacharyya coefficient measures the overlap between the observed modal-frequency density and the template-frequency density. A value close to 1 indicates that the two normalized distributions occupy the same regions of log-frequency space, whereas a value close to 0 indicates little or no overlap. In the present analysis, this term was used to quantify whether the modal frequencies of the reconstructed cavity and the frequencies of the transposed instrumental grid are concentrated in similar frequency regions. It complements the Pearson correlation, which measures similarity of shape, by providing a direct measure of distributional overlap. However, the Bhattacharyya coefficient was not used as an independent statistical test. It was one component of the composite Method 1 score, whose statistical relevance was subsequently assessed through the conditional surrogate null model.

Third, a cumulative-distribution distance is evaluated. The cumulative distributions are defined as:

|  | (S33) |
| --- | --- |
|  | (S34) |

Then, the mean absolute distance between the two cumulative distributions is:

|  | (S35) |
| --- | --- |

This distance is converted into a similarity score:

|  | (S36) |
| --- | --- |

The composite score for Method 1 is finally defined as:

|  | (S37) |
| --- | --- |

For each intervallic template, the optimal transposition is obtained by maximizing over the admissible range of , using a coarse-to-fine search. This procedure identifies the transposed instrumental grid whose absolute-frequency distribution is most similar to the weighted modal distribution of the reconstructed cavity.

As an additional descriptive indicator, a hit count is computed after optimization. A modal frequency is counted as a hit when its distance from the nearest frequency of the optimized grid is smaller than a tolerance of 35 cents, namely when:

|  | (S38) |
| --- | --- |

This hit count is not used as the primary similarity score, but provides an intuitive measure of how many cavity modes fall close to the optimized instrumental grid.

**S2.7 Interval-structure score**

In both matching methods, a second descriptor measures whether the modal spacing is compatible with the spacing induced by the tested template. From the observed frequencies, all pairwise intervals satisfying

|  | (S39) |
| --- | --- |

are collected in cents:

|  | (S40) |
| --- | --- |

The same is done for the transposed instrumental grid, yielding . For each observed interval, the distance to the nearest template interval is:

|  | (S41) |
| --- | --- |

Then, the interval-structure score is:

|  | (S42) |
| --- | --- |

with cents. This score is used as an additional structural criterion in the final significance assessment.

**S2.8 Method 2: residual-concentration matching**

The second matching procedure is based on the residual distances between cavity modes and the optimized frequency grid. For a given , each observed frequency is associated with the nearest grid frequency . The residual in cents is:

|  | (S43) |
| --- | --- |

Residuals are capped at cents for robustness. Four summary statistics are then computed. First, the median residual:

|  | (S44) |
| --- | --- |

Second, the root-mean-square residual:

|  | (S45) |
| --- | --- |

Third, the fraction of modes within cents:

|  | (S46) |
| --- | --- |

and the fraction within cents:

|  | (S47) |
| --- | --- |

These are combined into a composite score:

|  | (S48) |
| --- | --- |

Again, the optimal transposition is determined by maximizing through a coarse-to-fine search.

**S2.9 Conditional null model**

To evaluate the statistical strength of the observed matches, both methods are tested against an empirical null model that preserves the broad frequency-span structure of each scenario but destroys the detailed arrangement of modal intervals. Let the ordered band-limited modal frequencies be , and define their log-frequencies with adjacent gaps

The gap sequence is divided into contiguous blocks of fixed length . These blocks are randomly permuted, and a small jitter is added to each gap:

|  | (S49) |
| --- | --- |

where is a block permutation and:

|  | (S50) |
| --- | --- |

is a random perturbation in octaves.

A random global shift is also applied to the first frequency:

|  | (S51) |
| --- | --- |

Then, the null sequence is reconstructed recursively:

|  | (S52) |
| --- | --- |

This produces surrogate modal sets that preserve the overall density scale and approximate bandwidth but disrupt the detailed intervallic organization. For each observed scenario-template pair, null realizations are generated.

**S2.10 Empirical p-values and global significance**

For any observed score and the corresponding null scores , the empirical p-value is computed as:

|  | (S53) |
| --- | --- |

This is done at two levels. First, at template level, where the observed score is compared with the null distribution of the same template. Second, at global level, where the observed best score is compared with the null distribution of the best score across all templates within the same family. An empirical z-score is also computed:

|  | (S54) |
| --- | --- |

where and are the mean and standard deviation of the corresponding null distribution.

**S2.11 Decision rule and robustness classes**

The final classification combines template-level significance, global significance, and empirical z-score. A result is classified as strong if It is classified as suggestive if and either or It is classified as weak if at least one among the global, structural, or empirical-z criteria indicates partial support, but the previous thresholds are not met. Otherwise, the result is classified as non-robust. In practical terms, these classes express how confidently the observed match can be distinguished from the matches obtained from randomized surrogate modal sets: strong results indicate converging statistical and effect-size support; suggestive results indicate a non-random tendency that remains plausible but not conclusive; weak results indicate only partial or unstable support; and non-robust results indicate that the observed compatibility cannot be distinguished reliably from surrogate behaviour.

Because the diatonic and chromatic hypotheses answer different historical questions, their rankings were kept separate throughout the analysis and summarized independently.

**References**

1. Aita, D. *et al.* The Roofing System of the Tholos of Athena Pronaia in Delphi: Archaeological Hypotheses and Structural Suggestions. *International Journal of Architectural Heritage* **19**, 906–931 (2025).

2. Schultz, P. & Wickkiser, B. L. Communicating with the Gods in Ancient Greece: The Design and Functions of the ‘Thymele’ at Epidauros. *The International Journal of Technology, Knowledge and Society* **6**, 143–163 (2010).

3. Cavanagh, W. G. & Laxton, R. R. The Structural Mechanics of the Mycenaean Tholos Tomb. *Annu. Br. Sch. Athens* **76**, 109–140 (1981).
